# Supplementary material for: Geometric parameters that affect the behavior of logic-gated CAR T cells
Source: PubMed Central journal article supplement (PMC10853413; doi:10.3389/fimmu.2024.1304765), 2024-01-26
Supplement: DataSheet_1.pdf [file DataSheet_1.pdf]

# Supplement 1

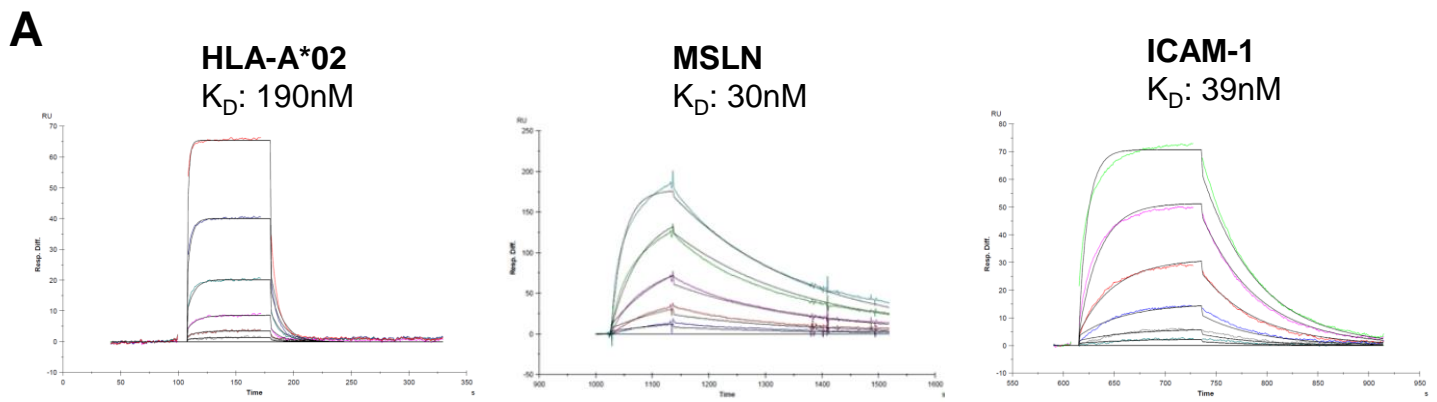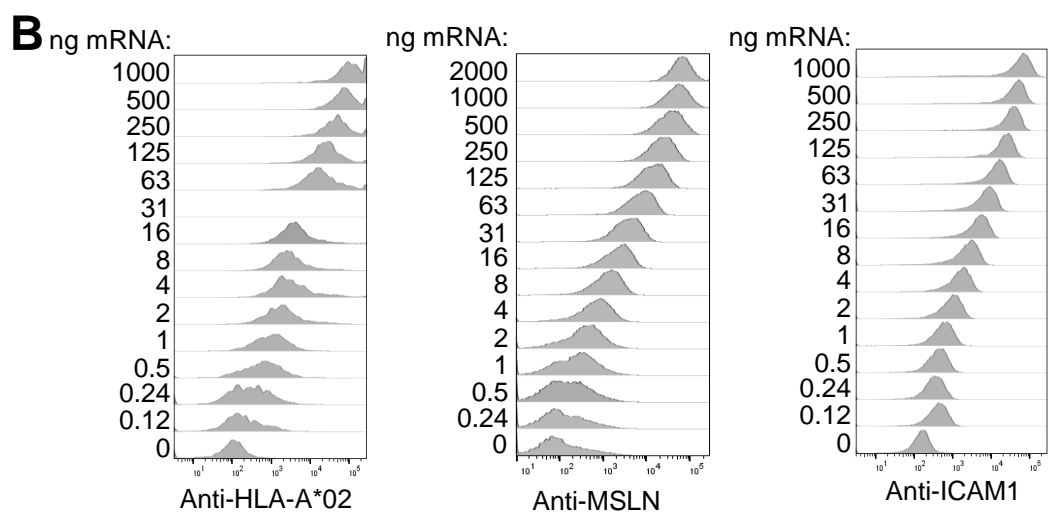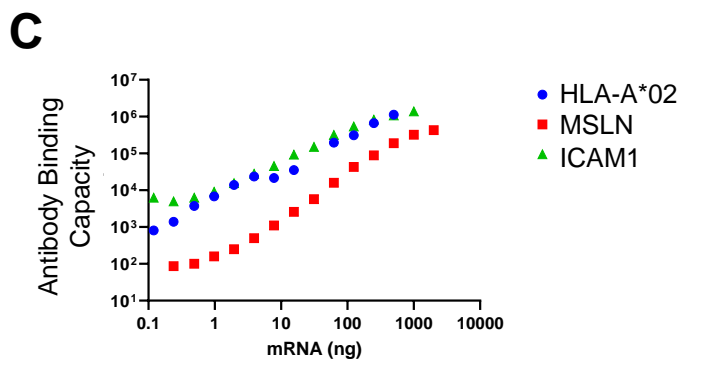

(A) scFv affinities for B-antigens shown in Figure 1. (B) mRNA titration of B-antigens on target cells. (C) Relative expression levels quantified by QIFI.

# Supplement 2

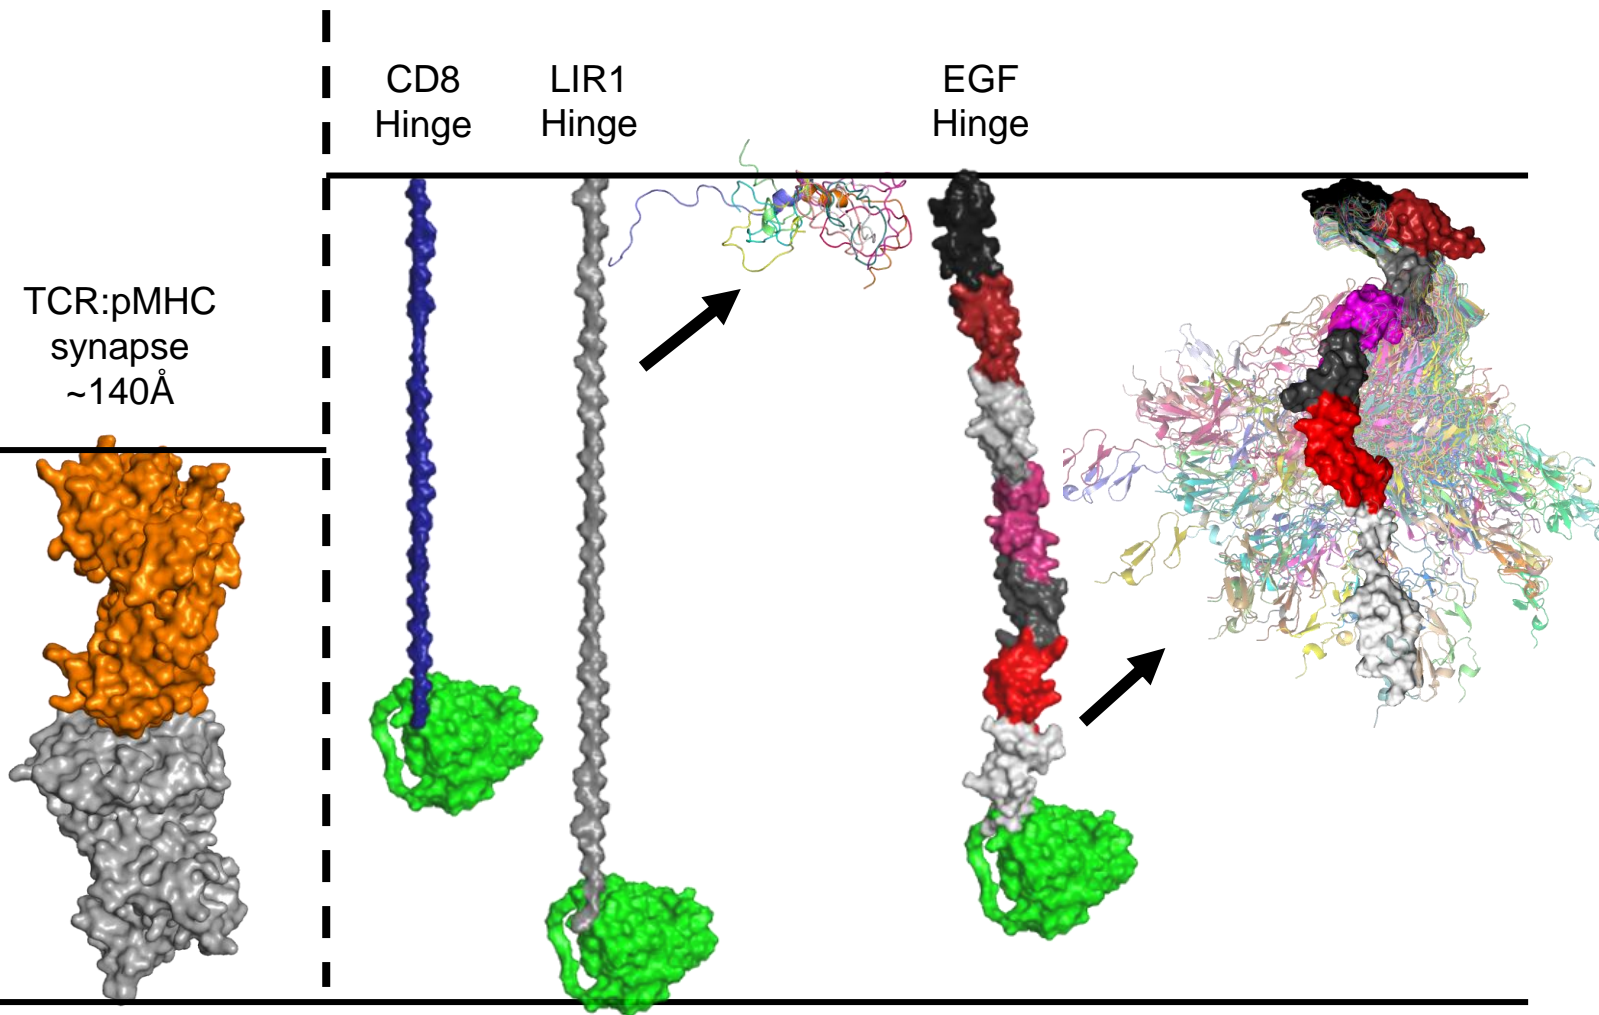

Comparison of Hinge Length and Flexibility relative to TCR:pMHC complex. 100 Monte Carlo simulations for each hinge were overlaid to assess flexibility.

# Supplement 3

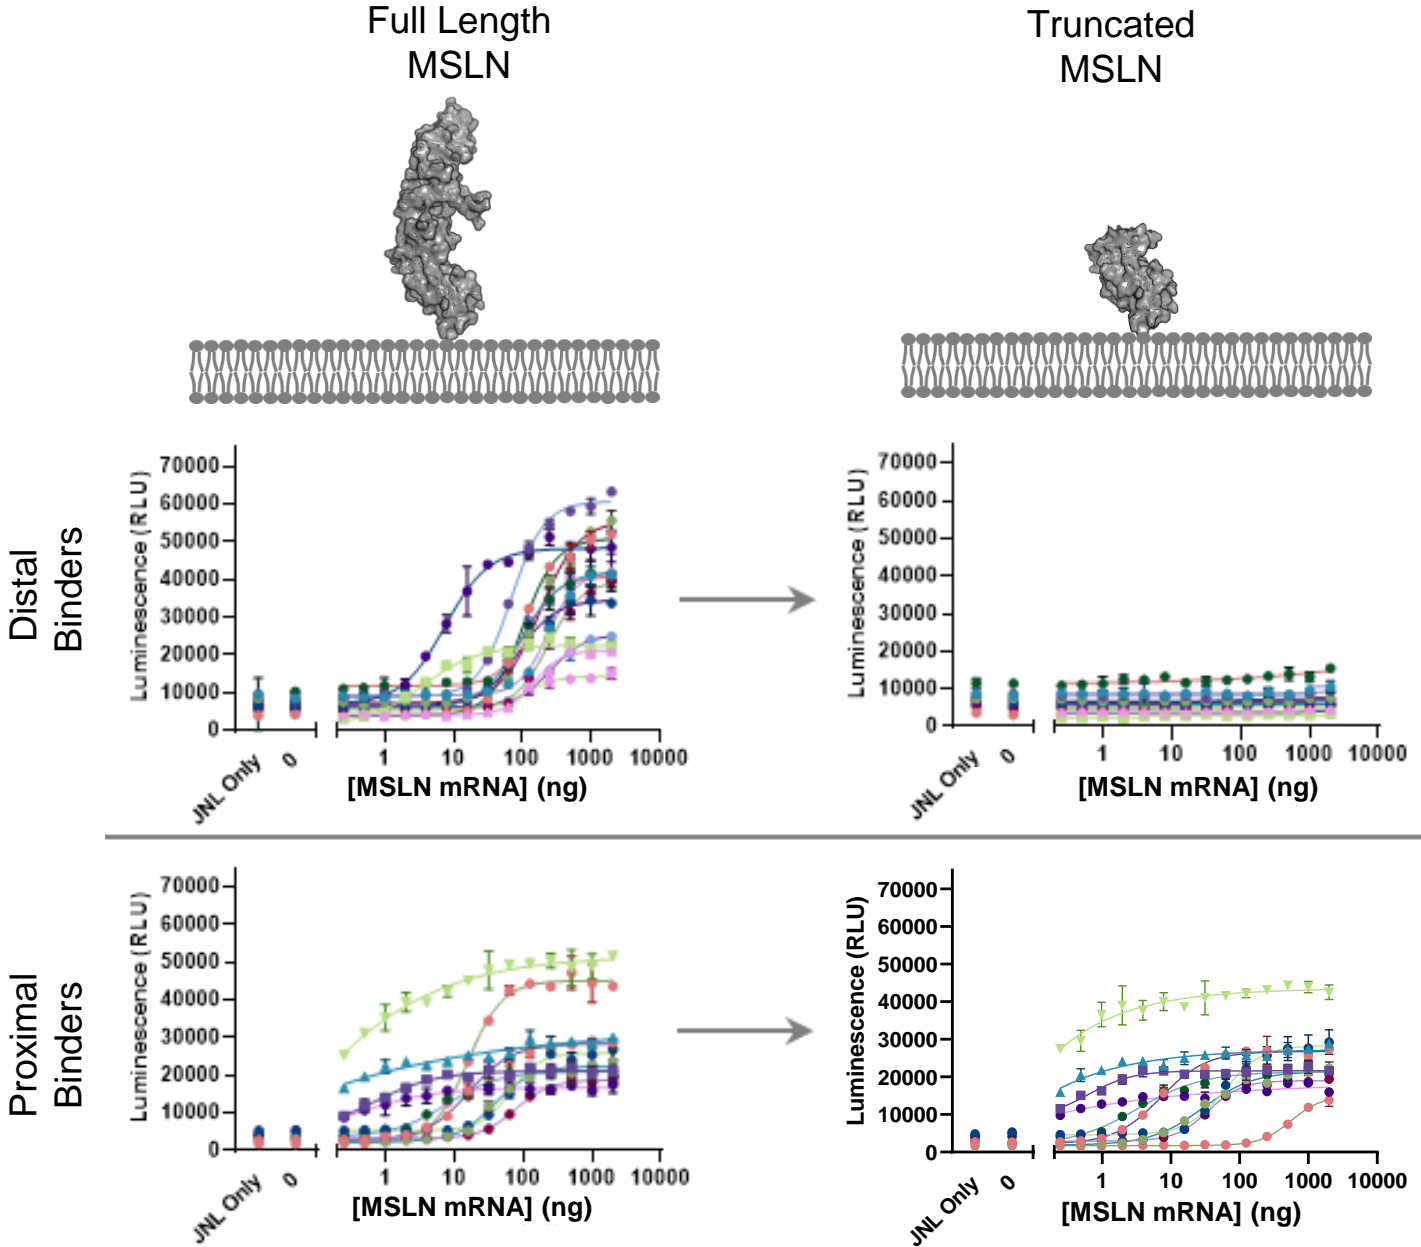

Functional assessment of MSLN CARs responding to full length or truncated MSLN. If a CAR did not respond to truncated form, it was classified as a distal binder

# Supplement 4

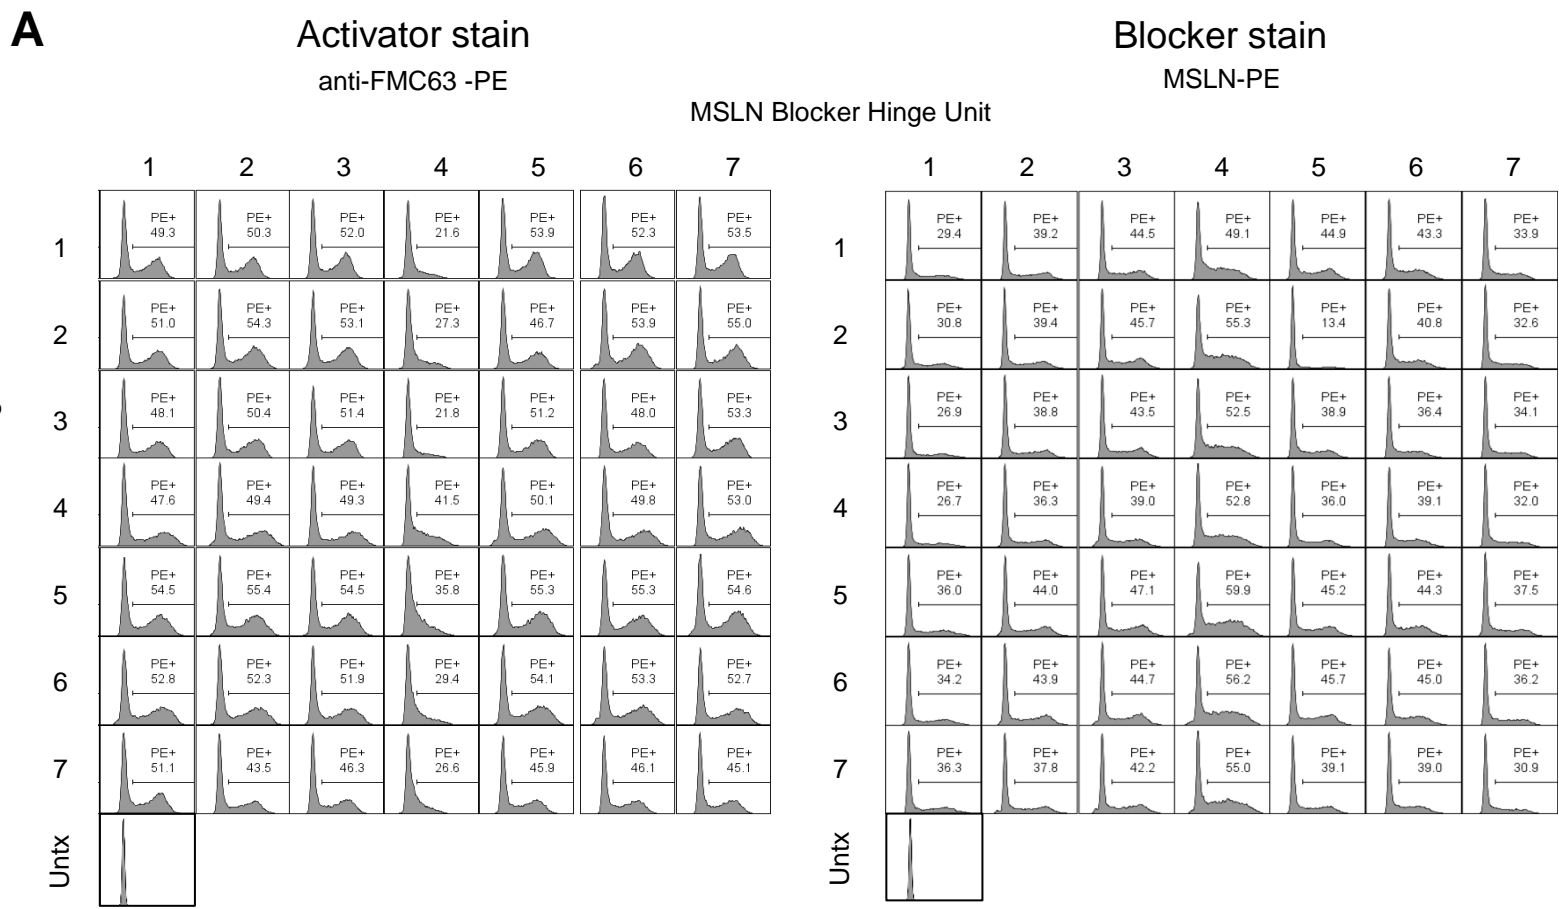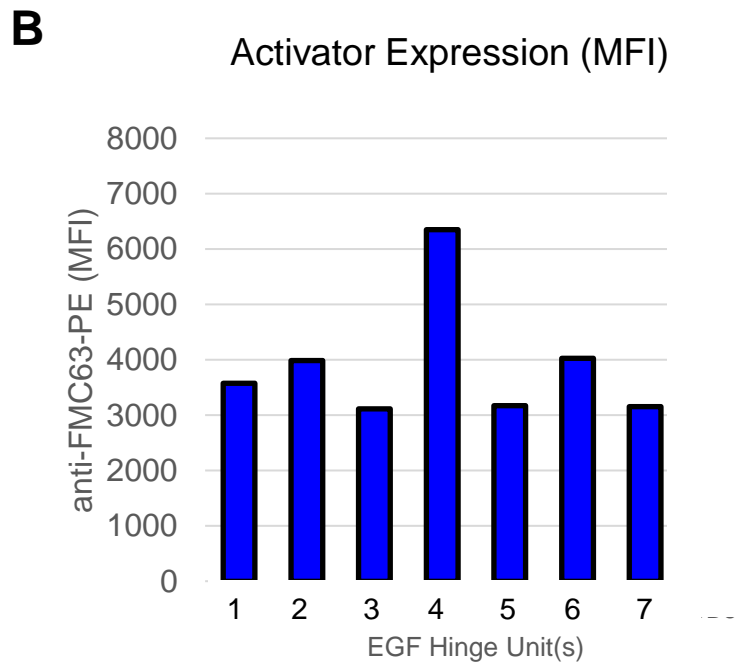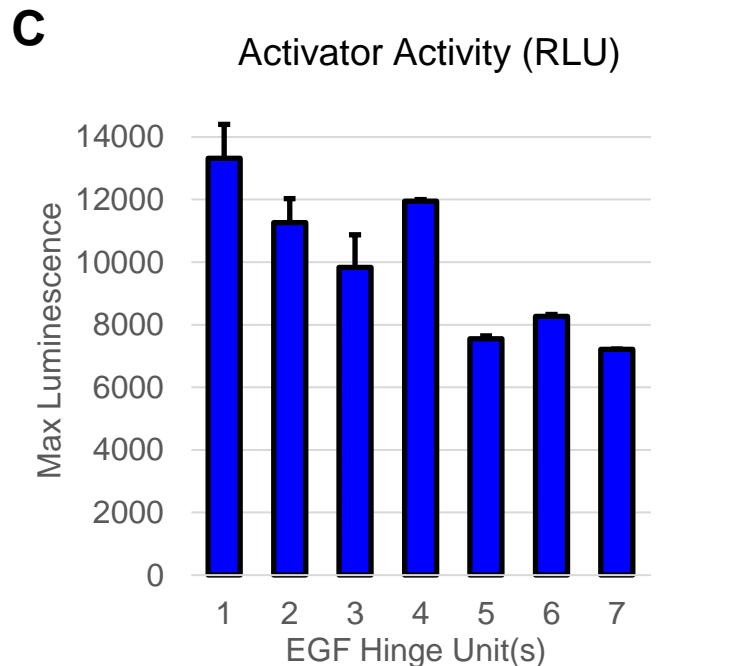

(A) Expression levels CD19 activator/MSLN blocker with EGF hinges. Untx, untransfected. (B) Relative expression levels of activator. (C) Max activation decreases as hinge length decreases independent of expression.

# Supplement 5

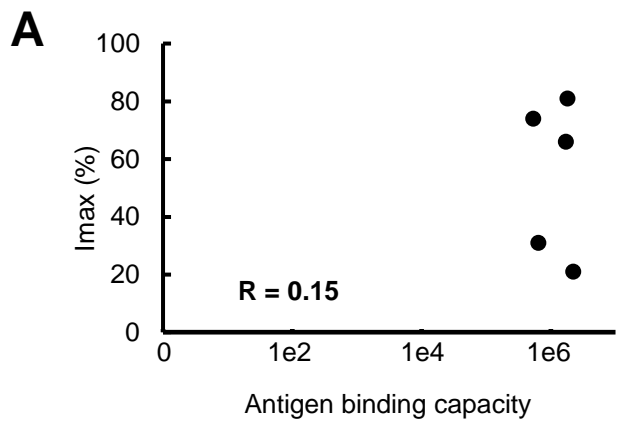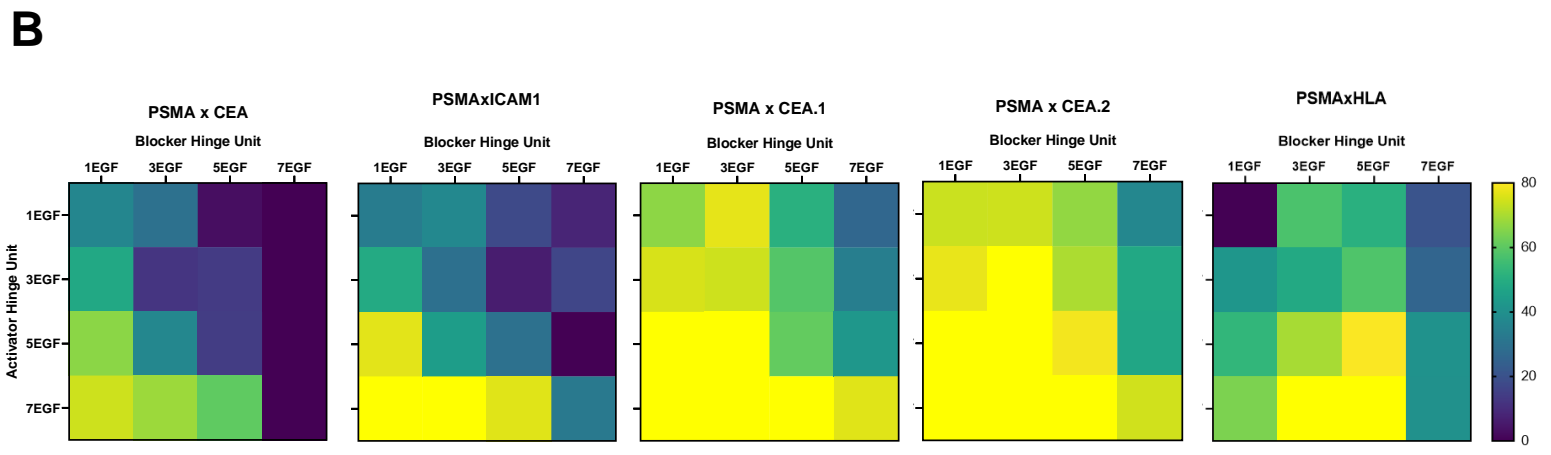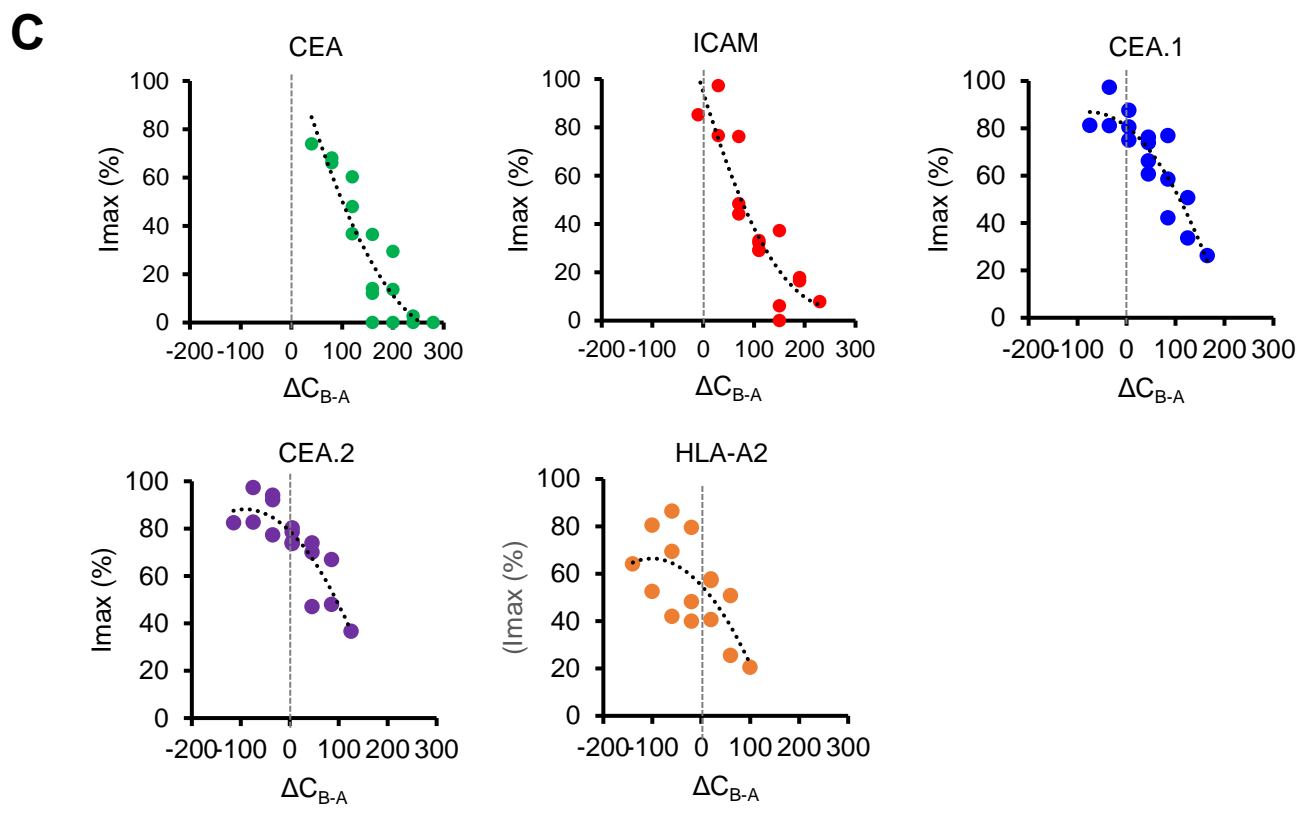

(A) Antigen density for FLAG-antigens exceeds 500k ABC and is uncorrelated with  $I_{max}$ . (B) Blocking profile when expanding the  $R_A$  or  $R_B$  with EGF modular hinges. (C) Plotting the  $I_{max}$  data from (B) versus total estimates of  $\Delta C$ .

# Supplement 6

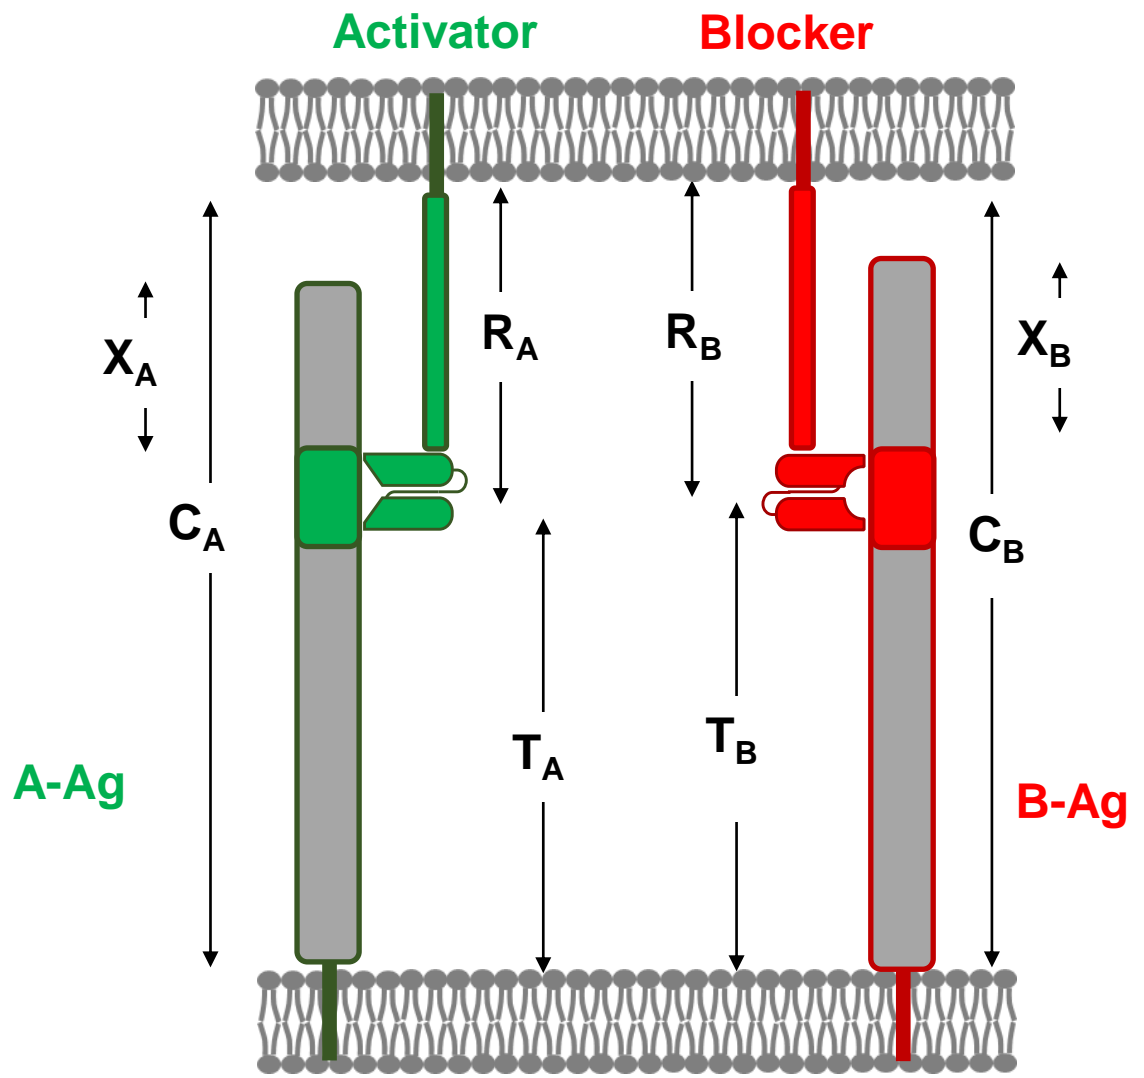

Full diagram of geometric parameters.
